# Supplementary material for: Fluocinolone Acetonide Implant for Uveitis: Dissecting Responder and Non-Responder Outcomes at a Tertiary Center
Source: MDPI journal article supplement (doi:10.3390/biomedicines12051106), 2024-05-16
Supplement: s1 [file s1]

**Table S1.** Linear Regression Analysis Results PPV vs No Previous PPV.

In the linear regression analysis, the intercept ( $\beta_0$ ) represents the mean CRT change for the non-PPV group. The PPV coefficient ( $\beta_1$ ) indicates the difference in mean CRT change between the PPV and non-PPV groups.

CRT = central retinal thickness, PPV = pars plana vitrectomy

| Month | Intercept ( $\beta_0$ ) | PPV Coefficient ( $\beta_1$ ) | <i>p</i> -Value |
|-------|-------------------------|-------------------------------|-----------------|
| 1     | -113.13                 | 47.55                         | 0.0999          |
| 3     | -120.43                 | 40.49                         | 0.1685          |
| 6     | -125.20                 | 39.38                         | 0.2754          |
| 12    | -135.88                 | 44.47                         | 0.1346          |
| 24    | -135.45                 | 79.45                         | 0.0466          |
